# Supplementary material for: Insecticidal Activity and Free Radical Scavenging Properties of Isolated Phytoconstituents from the Saudi Plant Nuxia oppositifolia (Hochst.)
Source: MDPI journal article supplement (doi:10.3390/molecules26040914), 2021-02-09
Supplement: s1 [file s1]

## SUPPLEMENTARY MATERIAL

# Insecticidal Activity and Free Radical Scavenging Properties of Isolated Phytoconstituents from the Saudi Plant *Nuxia oppositifolia* (Hochst.)

Shaza M. Al-Massarani<sup>1\*</sup>, Ali A. El-Gamal<sup>1,2</sup>, Adnan J. Al-Rehaily<sup>1</sup>, Ebtesam S. Al-Sheddi<sup>1</sup>, Mai M. Al-Oqail<sup>1</sup>, Nida N.

Farshori<sup>1</sup>, Alden S. Estep<sup>3,4</sup>, Nurhayat Tabanca<sup>5</sup>, James J. Becnel<sup>3</sup>

<sup>1</sup>Department of Pharmacognosy, King Saud University, College of Pharmacy, P.O. Box 2457, Riyadh Saudi Arabia

<sup>2</sup>Department of Pharmacognosy, Mansoura University, College of Pharmacy, 35516, El-Mansoura, Egypt

<sup>3</sup>USDA, ARS, Center for Medical, Agricultural, and Veterinary Entomology, Gainesville, FL 32608 USA

<sup>4</sup>Navy Entomology Center of Excellence, CMAVE Detachment, 1700 SW 23<sup>rd</sup> Drive, Gainesville, FL 32608 USA

<sup>5</sup>USDA-ARS, Subtropical Horticulture Research Station, 13601 Old Cutler Rd., Miami, FL 33158 USA

\*Corresponding author: [salmassarani@ksu.edu.sa](mailto:salmassarani@ksu.edu.sa)

## Abstract

**Abstract:** Chromatographic purification of the alcoholic extract of the aerial parts of the Saudi plant *Nuxia oppositifolia* (Hochst.) Benth., led to the isolation of five phenolic compounds. Two flavones, hispidulin (**1**) and jaceosidin (**2**), and the phenylethanoid glycosides, verbascoside (**3**), isoverbascoside (**4**) and conandroside (**5**), were identified. Their chemical structures were determined based on extensive spectroscopic analyses. The insecticidal activity of compounds **1** and **2**, in addition to 11 compounds isolated in a previous research (**6-16**), was evaluated against the Yellow Fever mosquito, *Aedes aegypti*. Four compounds displayed adulticidal activity with LD<sub>50</sub> values of 2–2.3 µg/mosquito. Further, the free radical scavenging properties of the plant extracts and compounds (**1-5**) were evaluated by measuring 1,1-diphenyl-2-picrylhydrazyl radical (DPPH) and 2,2'-azino-bis (3-ethylbenzothiazoline-6-sulfonate radical cation (ABTS<sup>•+</sup>) scavenging activity. All compounds exhibited notable activity, compared to the positive control, L-ascorbic acid. This study suggests that *N. oppositifolia* can be considered a promising source of secondary metabolites with lethal adulticidal effect against *Ae. aegypti*.

**Keywords:** *Nuxia oppositifolia*; flavonoids; phenylethanoid; triterpenes; Mosquito control; biopesticides; *Ae. aegypti*; free radical scavenging

## Contents

**Figure S1** <sup>1</sup>HNMR (500MHz, DMSO) spectrum of compound **1**

**Figure S2** COSY (500 MHz, DMSO) spectrum of compound **1**

**Figure S3** <sup>13</sup>CNMR (125MHz, DMSO) spectrum of compound **1**

**Figure S4** DEPT experiment (125MHz, DMSO) spectrum of compound **1**

**Figure S5** HSQC (500 MHz, DMSO) spectrum of compound **1**

**Figure S6** HMBC (500 MHz, DMSO) spectrum of compound **1**

**Figure S7** <sup>1</sup>HNMR (500MHz, DMSO) spectrum of compound **2**

**Figure S8** COSY (500 MHz, DMSO) spectrum of compound **2**

**Figure S9** <sup>13</sup>CNMR (125MHz, DMSO) spectrum of compound **2**

**Figure S10** DEPT experiment (125MHz, DMSO) spectrum of compound **2**

**Figure S11** HSQC (500 MHz, DMSO) spectrum of compound **2**

**Figure S12** HMBC (500 MHz, DMSO) spectrum of compound 2

**Figure S13**  $^1\text{H}$ NMR (500MHz,  $\text{CD}_3\text{OD}$ ) spectrum of compound 3

**Figure S14** COSY (500 MHz,  $\text{CD}_3\text{OD}$ ) spectrum of compound 3

**Figure S15**  $^{13}\text{C}$ NMR (125MHz,  $\text{CD}_3\text{OD}$ ) spectrum of compound 3

**Figure S16** DEPT experiment (125MHz,  $\text{CD}_3\text{OD}$ ) spectrum of compound 3

**Figure S17** HSQC (500 MHz,  $\text{CD}_3\text{OD}$ ) spectrum of compound 3

**Figure S18** HMBC (500 MHz,  $\text{CD}_3\text{OD}$ ) spectrum of compound 3

**Figure S19**  $^1\text{H}$ NMR (500MHz,  $\text{CD}_3\text{OD}$ ) spectrum of compound 4

**Figure S20** Expanded  $^1\text{H}$ NMR (500MHz,  $\text{CD}_3\text{OD}$ ) spectrum of compound 4

**Figure S21**  $^{13}\text{C}$ NMR (125MHz,  $\text{CD}_3\text{OD}$ ) spectrum of compound 4

**Figure S22** DEPT experiment (125MHz,  $\text{CD}_3\text{OD}$ ) spectrum of compound 4

**Figure S19**  $^1\text{H}$ NMR (500MHz,  $\text{CD}_3\text{OD}$ ) spectrum of compound 5

**Figure S20** COSY (500 MHz,  $\text{CD}_3\text{OD}$ ) spectrum of compound 5

**Figure S21**  $^{13}\text{C}$ NMR (125MHz,  $\text{CD}_3\text{OD}$ ) spectrum of compound 5

**Figure S22** DEPT experiment (125MHz,  $\text{CD}_3\text{OD}$ ) spectrum of compound 5

**Figure S23** HSQC (500 MHz,  $\text{CD}_3\text{OD}$ ) spectrum of compound 5

**Figure S24** HMBC (500 MHz,  $\text{CD}_3\text{OD}$ ) spectrum of compound 5

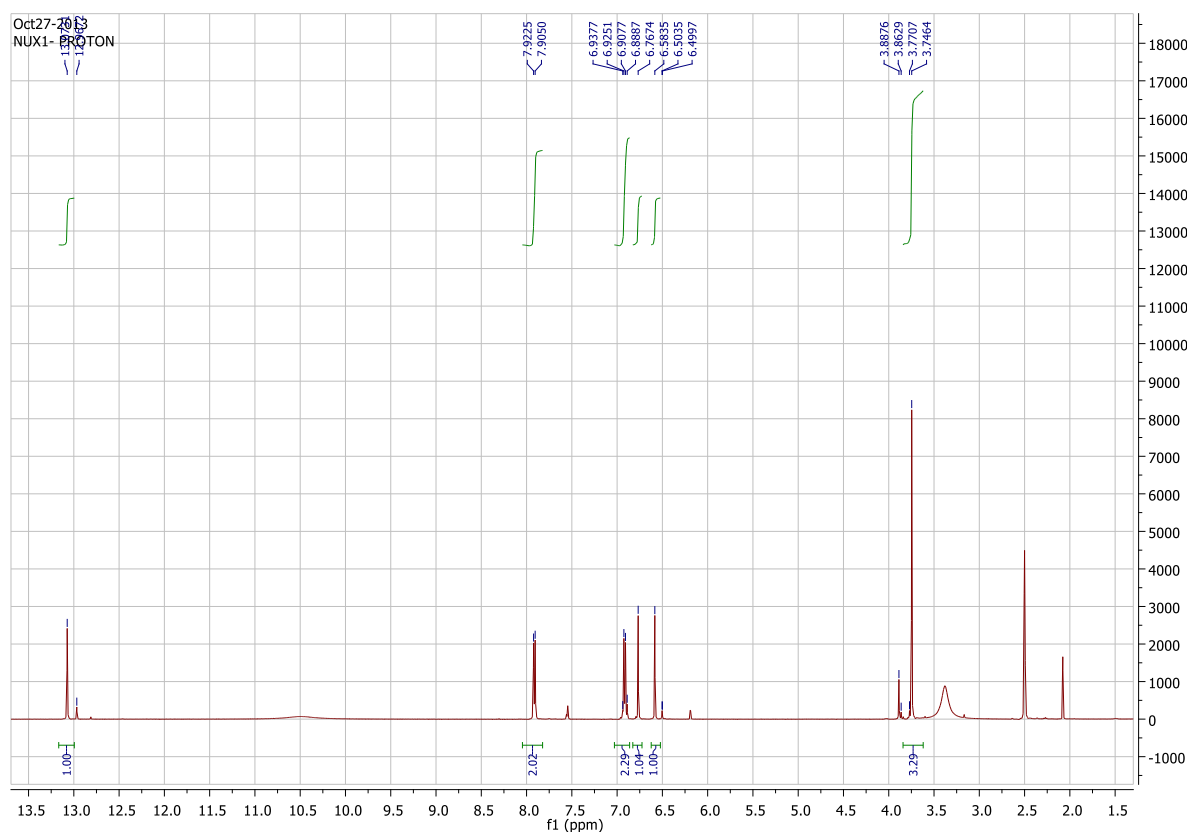

**Figure S1**  $^1\text{H}$ NMR (500MHz,  $\text{CD}_3\text{OD}$ ) spectrum of compound 1

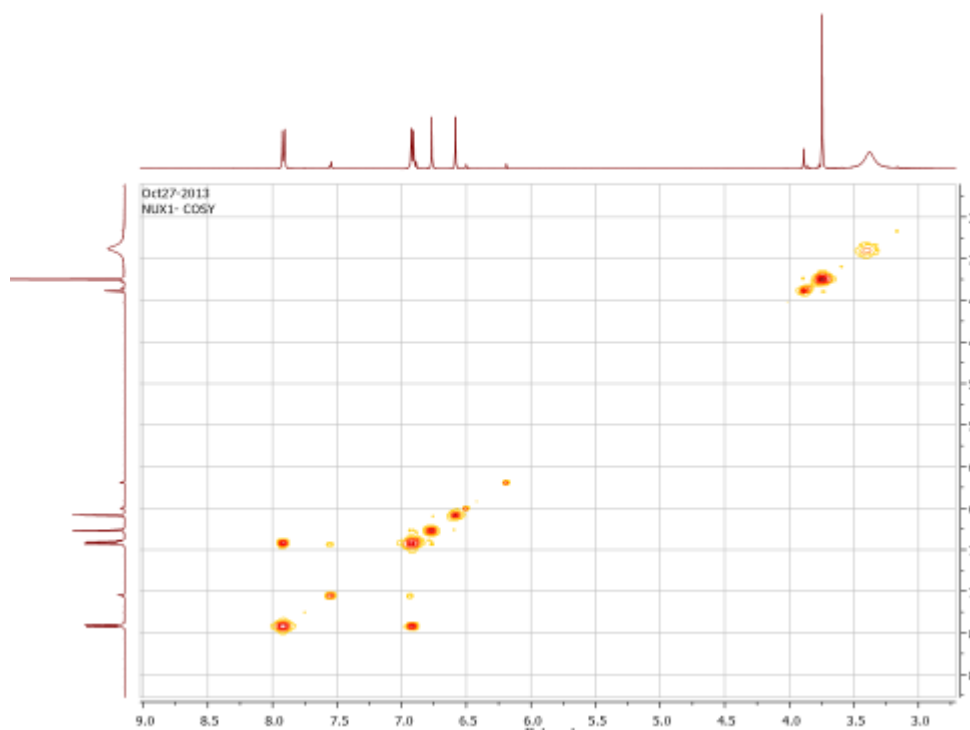

Figure S2 COSY (500 MHz, CD<sub>3</sub>OD) spectrum of compound 1

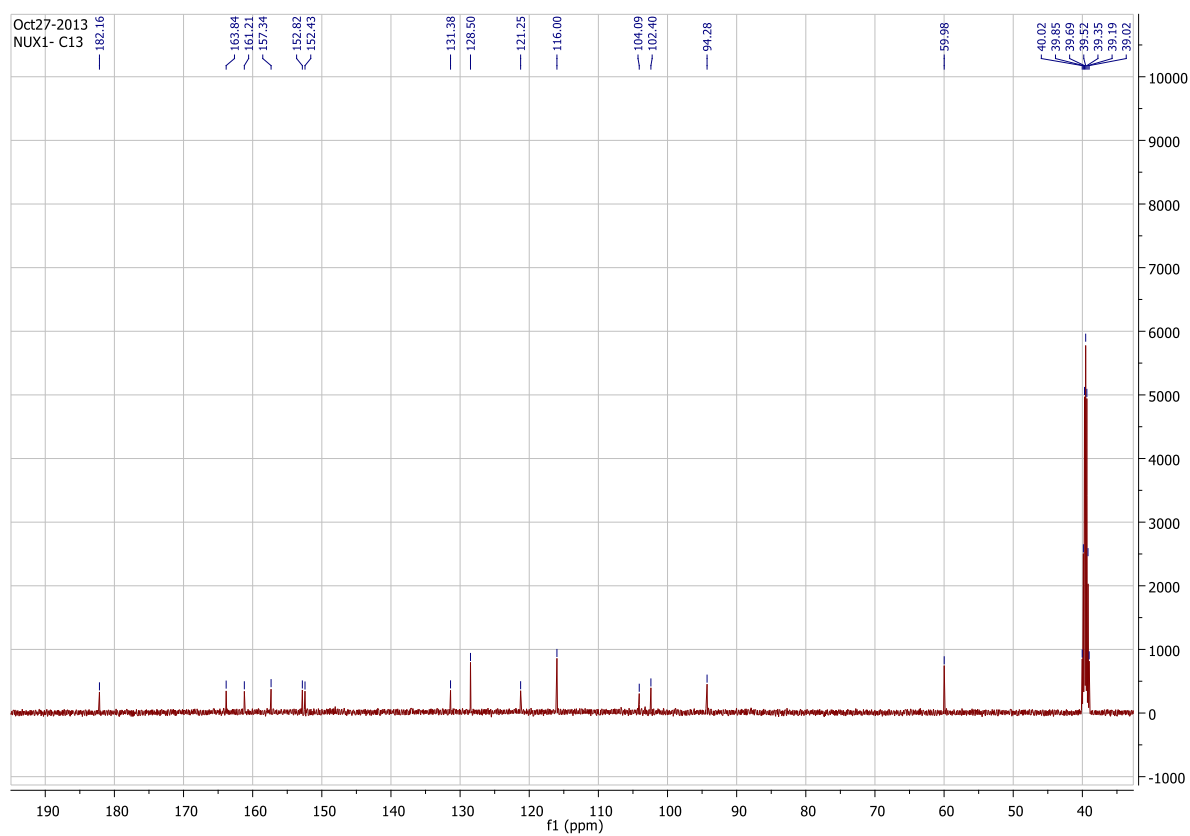

Figure S3 <sup>13</sup>CNMR (125MHz, CD<sub>3</sub>OD) spectrum of compound 1

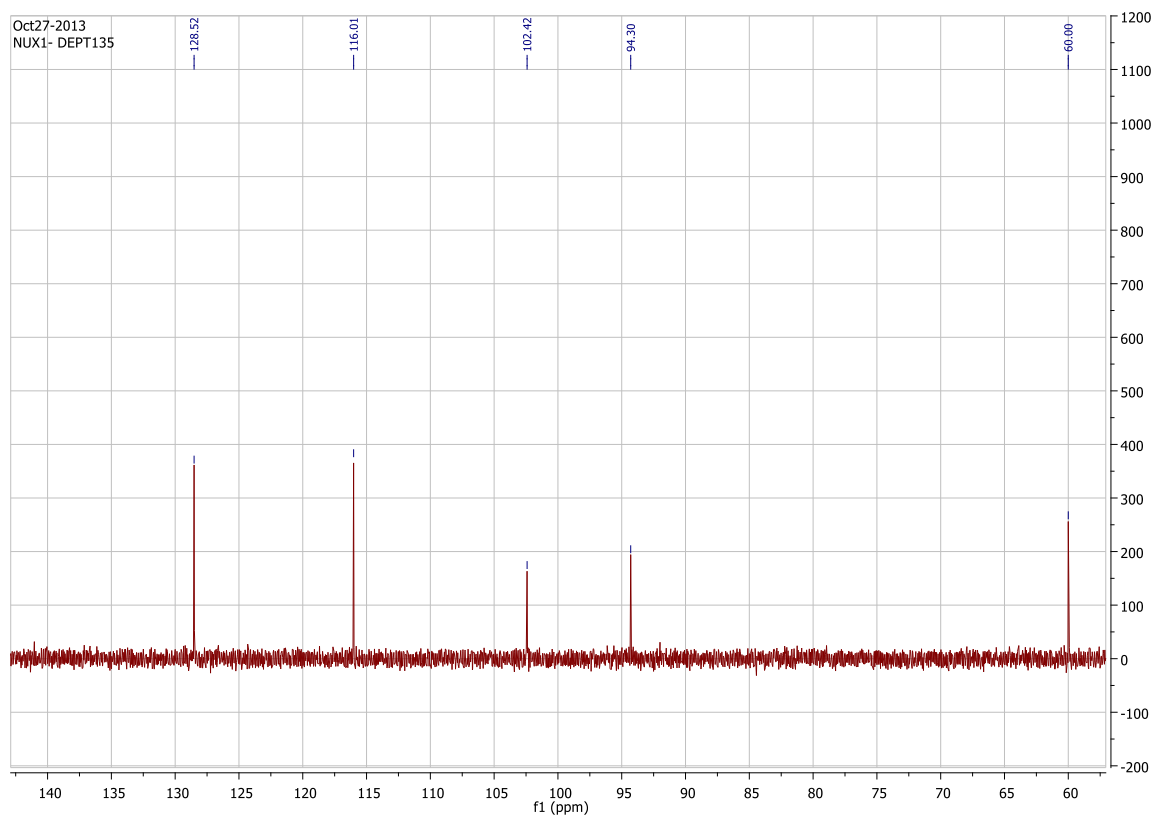

**Figure S4** DEPT experiment (125MHz, CD<sub>3</sub>OD) spectrum of compound **1**

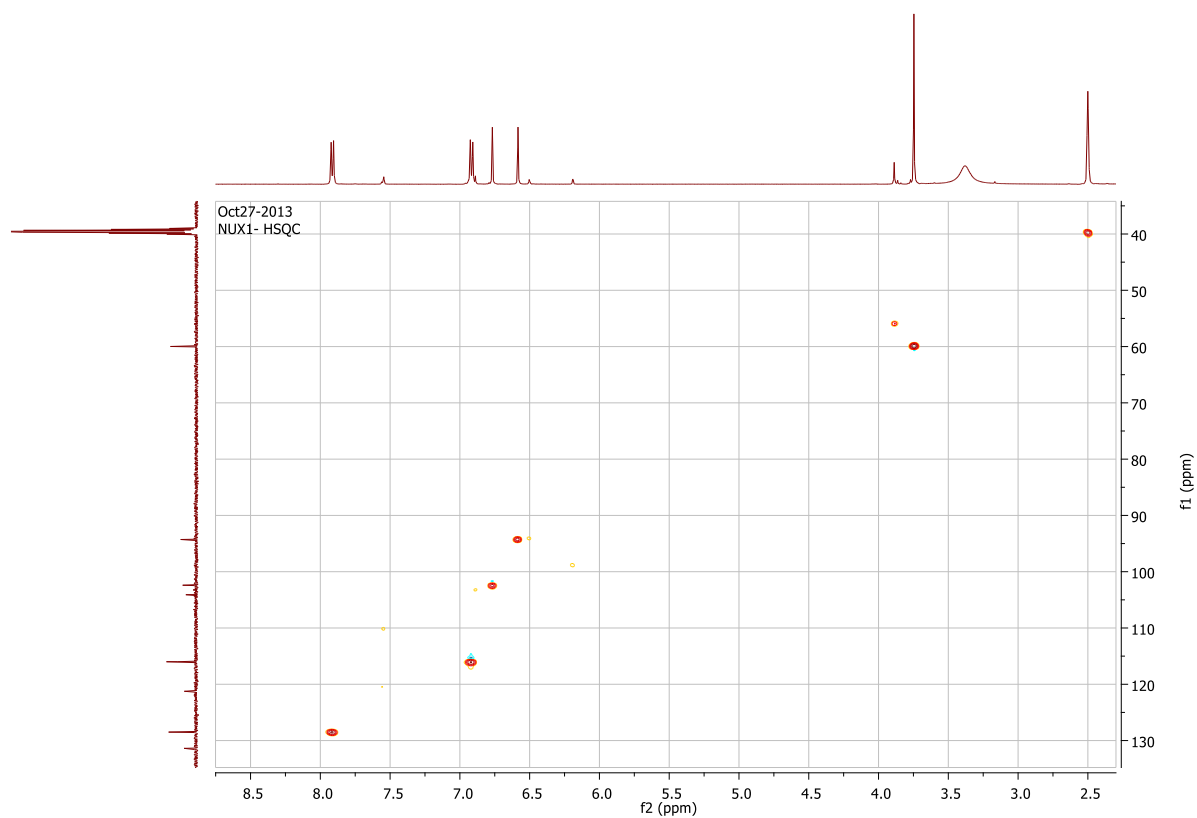

**Figure S5** HSQC (500 MHz, CD<sub>3</sub>OD) spectrum of compound **1**

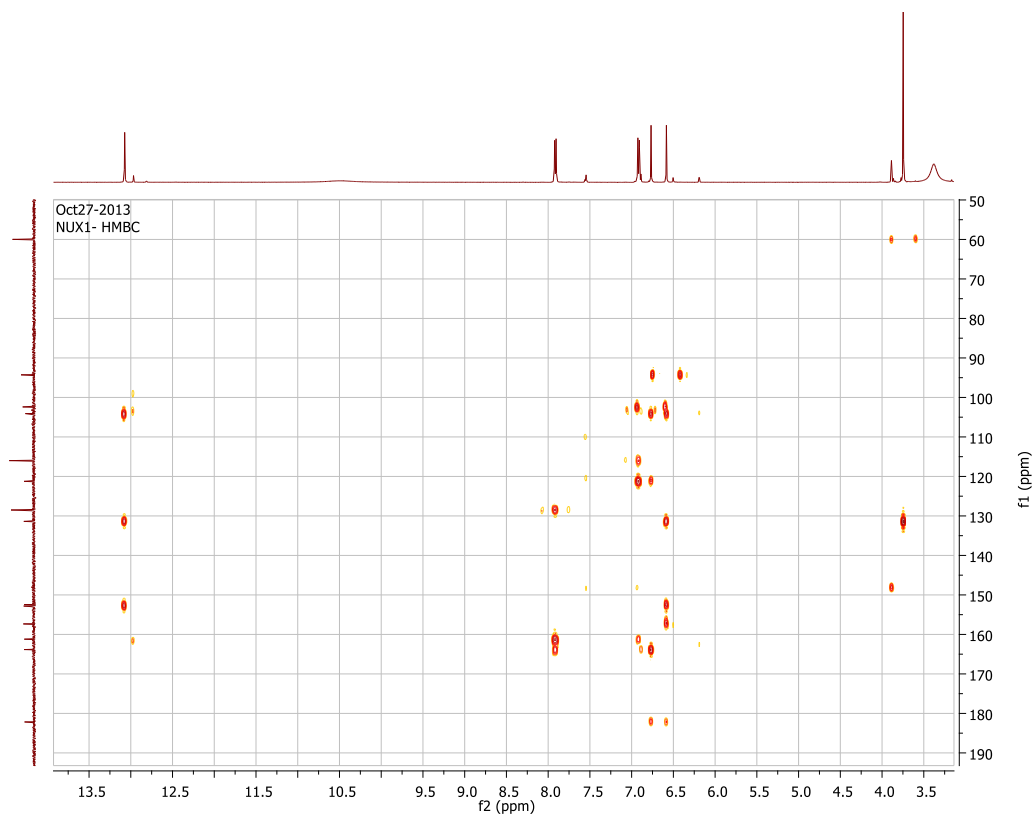

**Figure S6** HMBC spectrum (500 MHz, CD<sub>3</sub>OD) spectrum of compound **1**

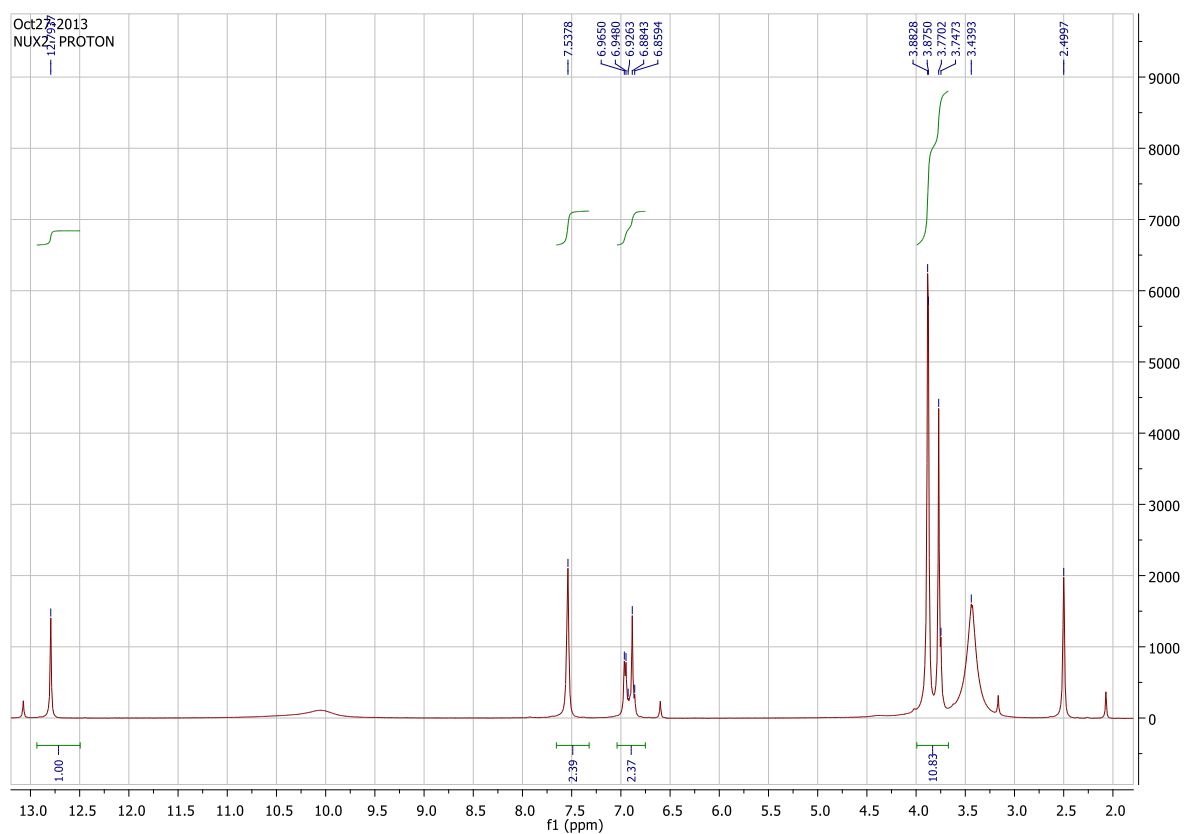

**Figure S7** <sup>1</sup>H NMR (500 MHz, CD<sub>3</sub>OD) spectrum of compound **2**

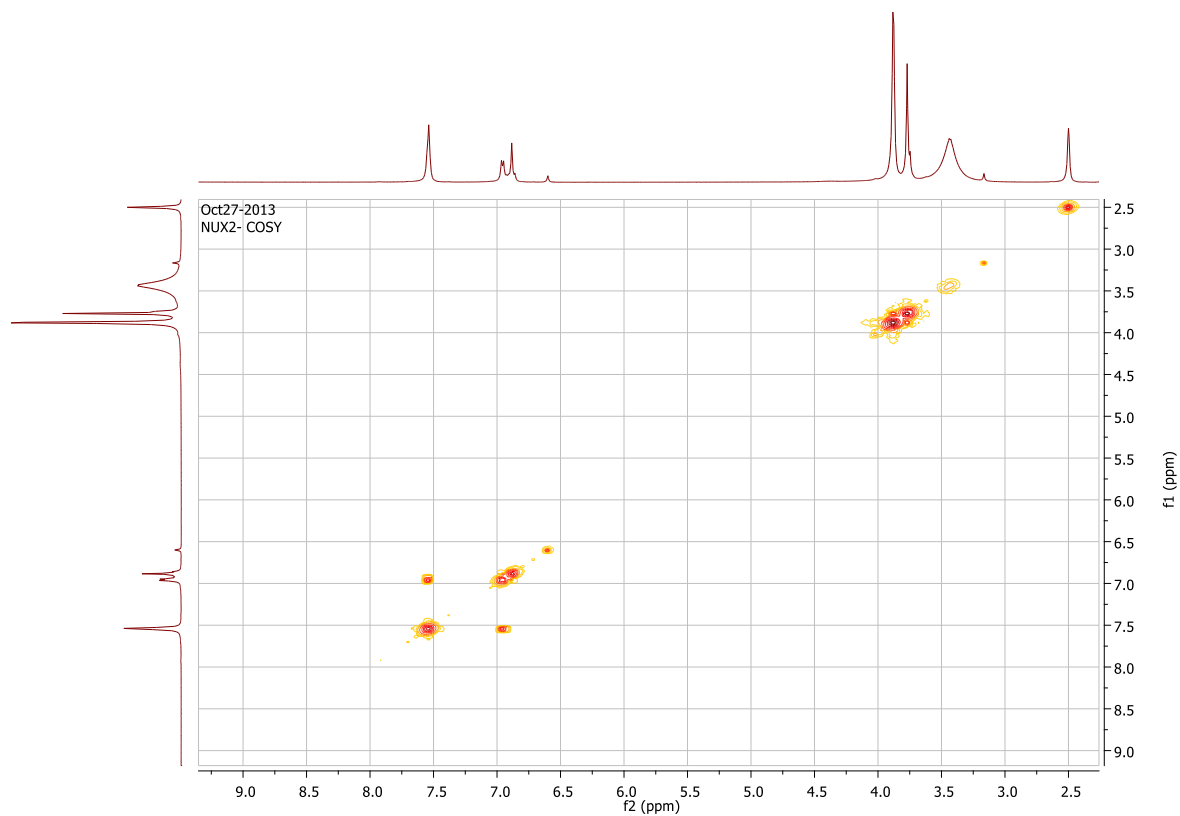

**Figure S8** COSY (500 MHz, CD<sub>3</sub>OD) spectrum of compound **2**

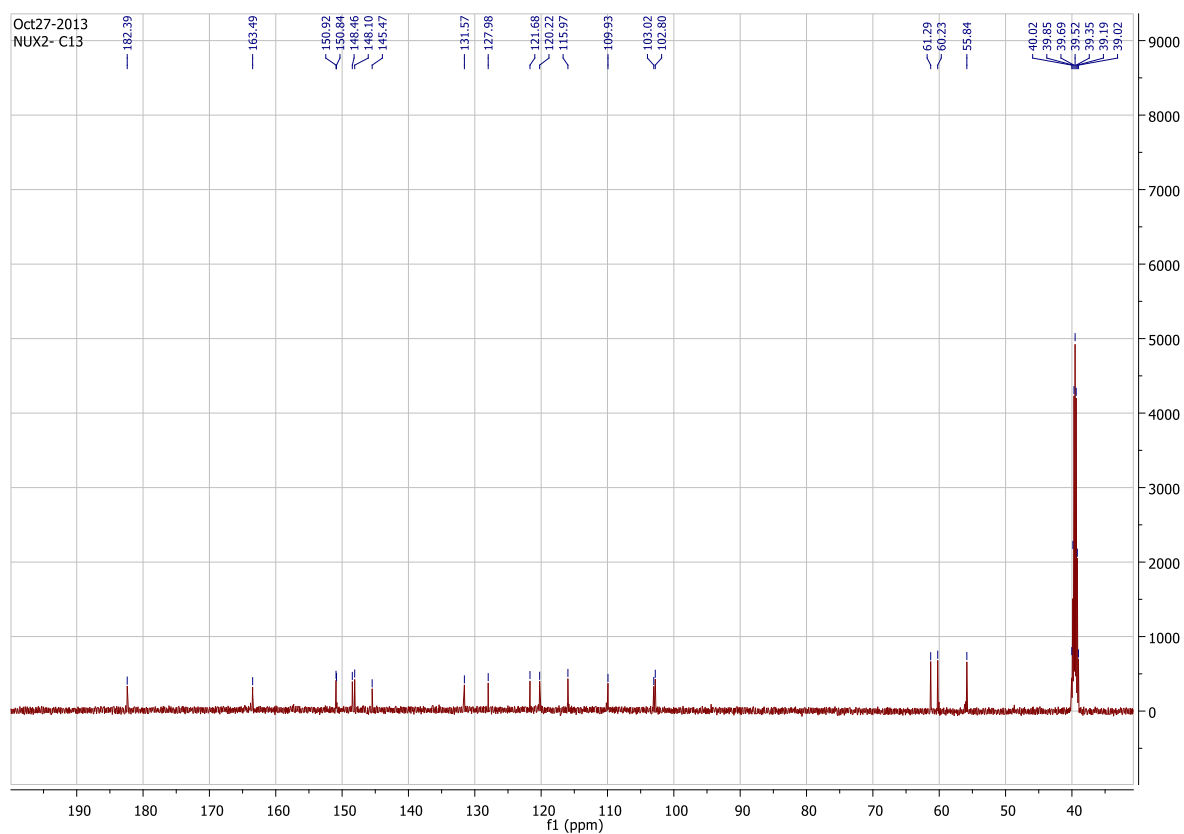

**Figure S9** <sup>13</sup>CNMR (125MHz, CD<sub>3</sub>OD) spectrum of compound **2**

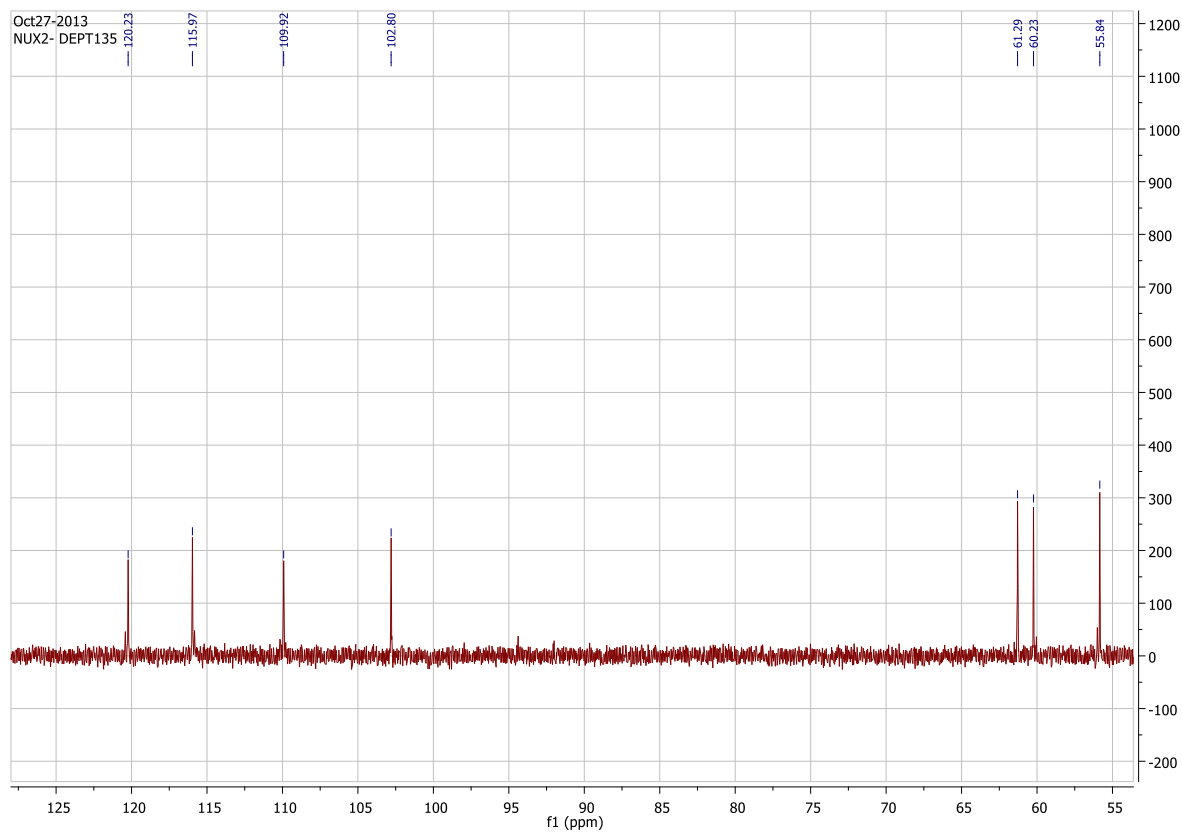

Figure S10 DEPT experiment (125MHz, CD<sub>3</sub>OD) spectrum of compound 2

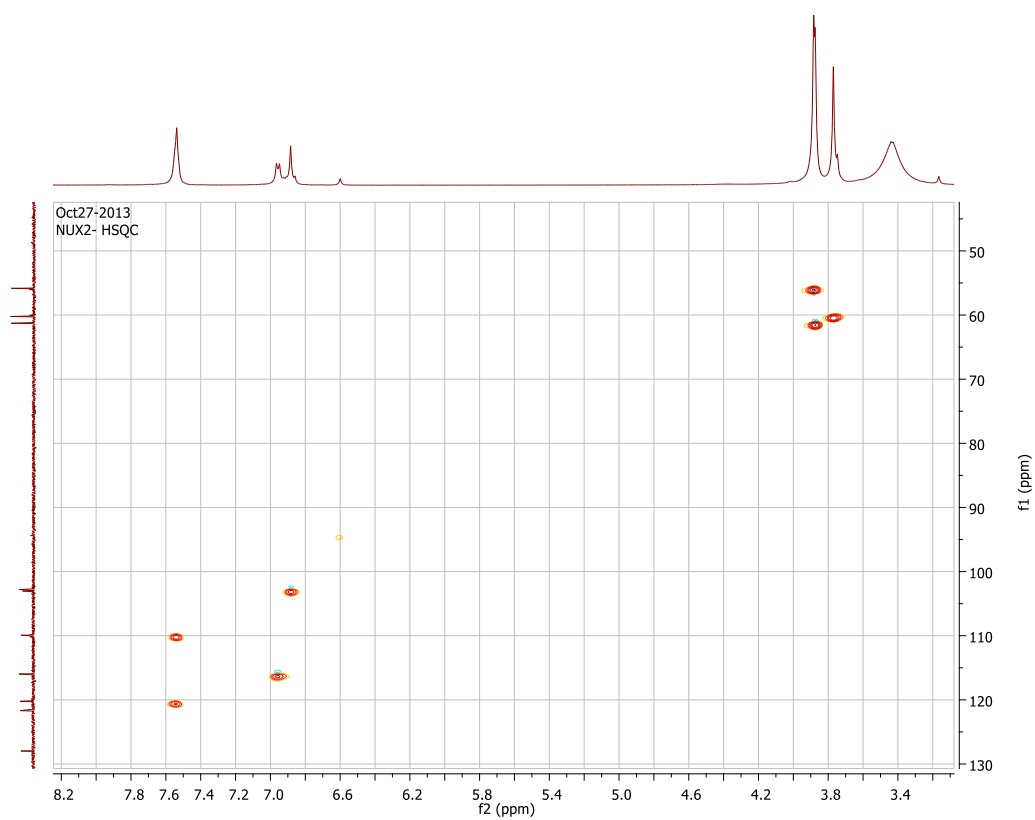

Figure S11 HSQC (500 MHz, CD<sub>3</sub>OD) spectrum of compound 2

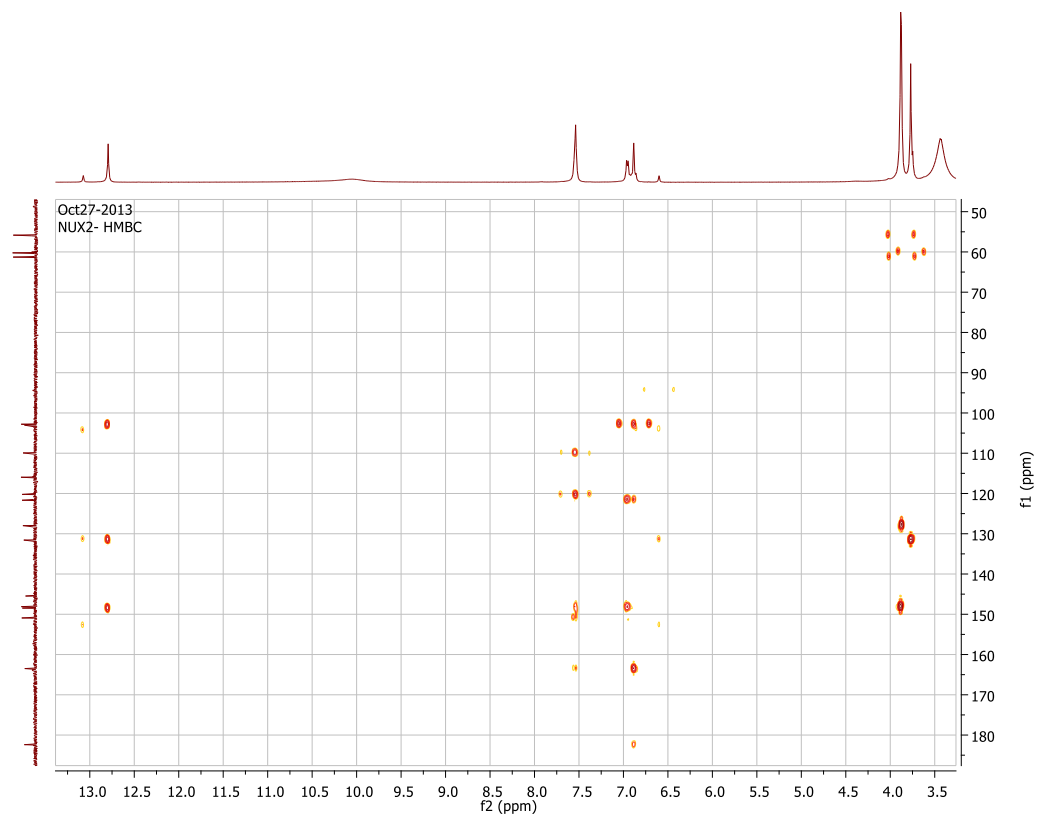

**Figure S12** HMBC spectrum (500 MHz, CD<sub>3</sub>OD) spectrum of compound **2**



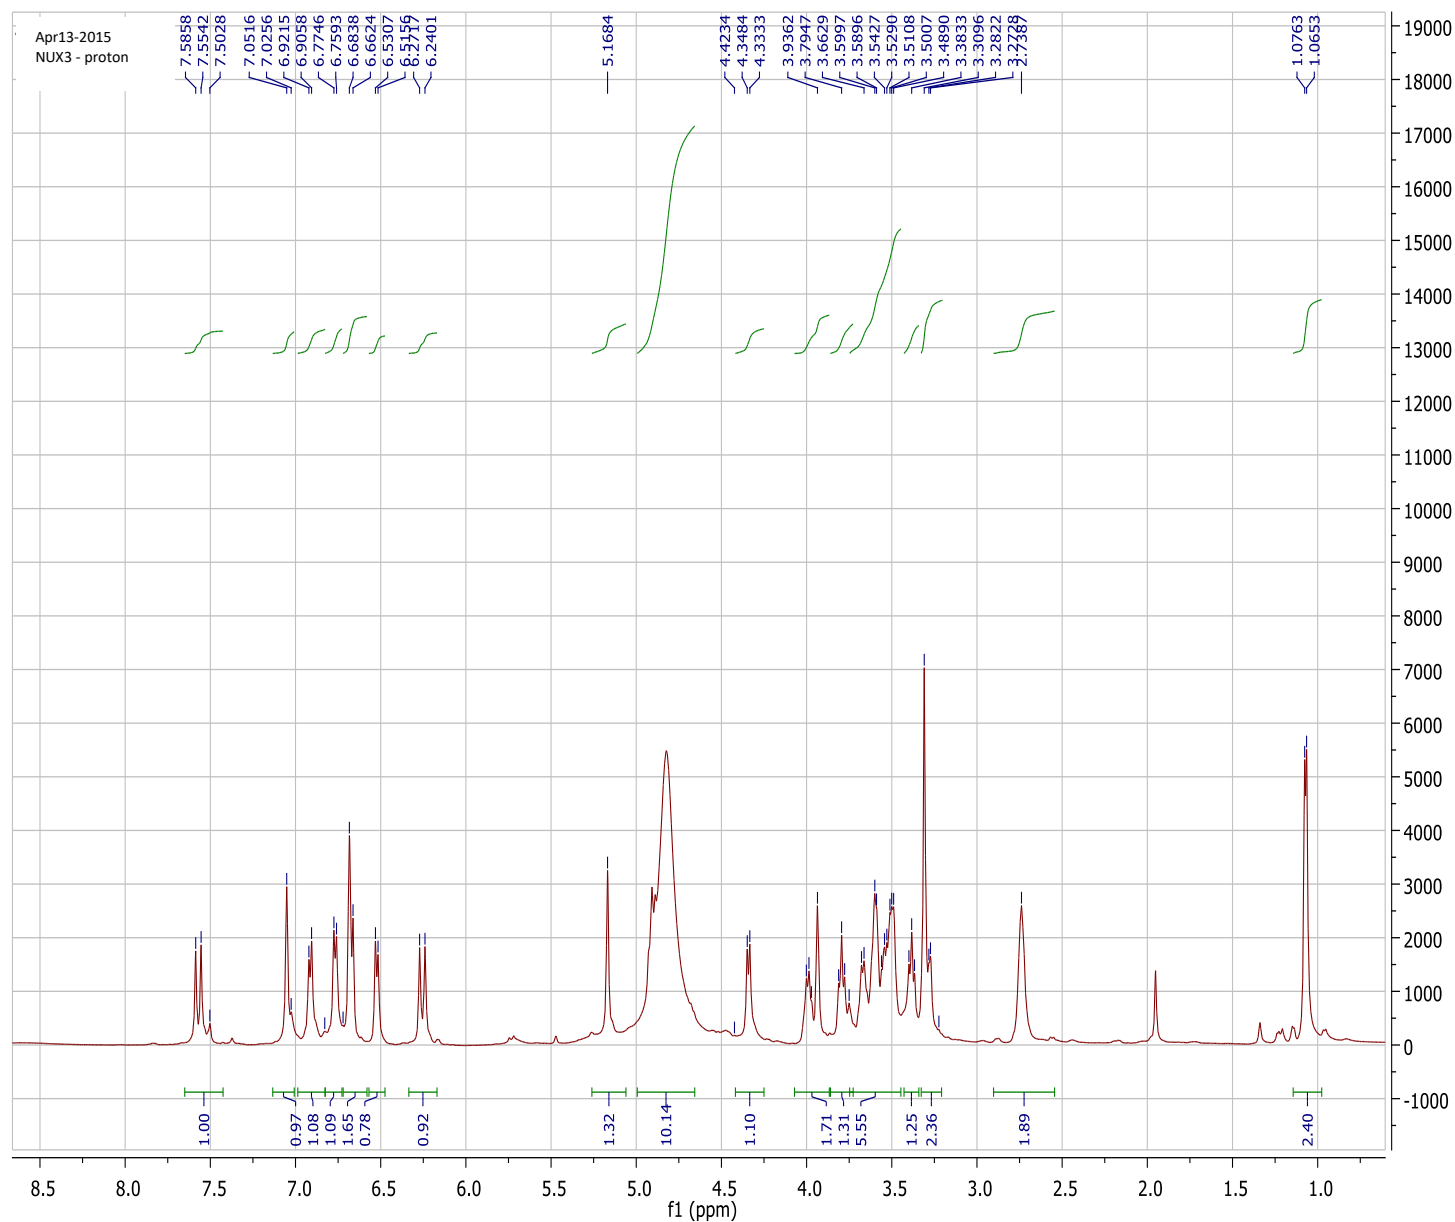

**Figure S13**  $^1\text{H}$ NMR (500MHz,  $\text{CD}_3\text{OD}$ ) spectrum of compound **3**

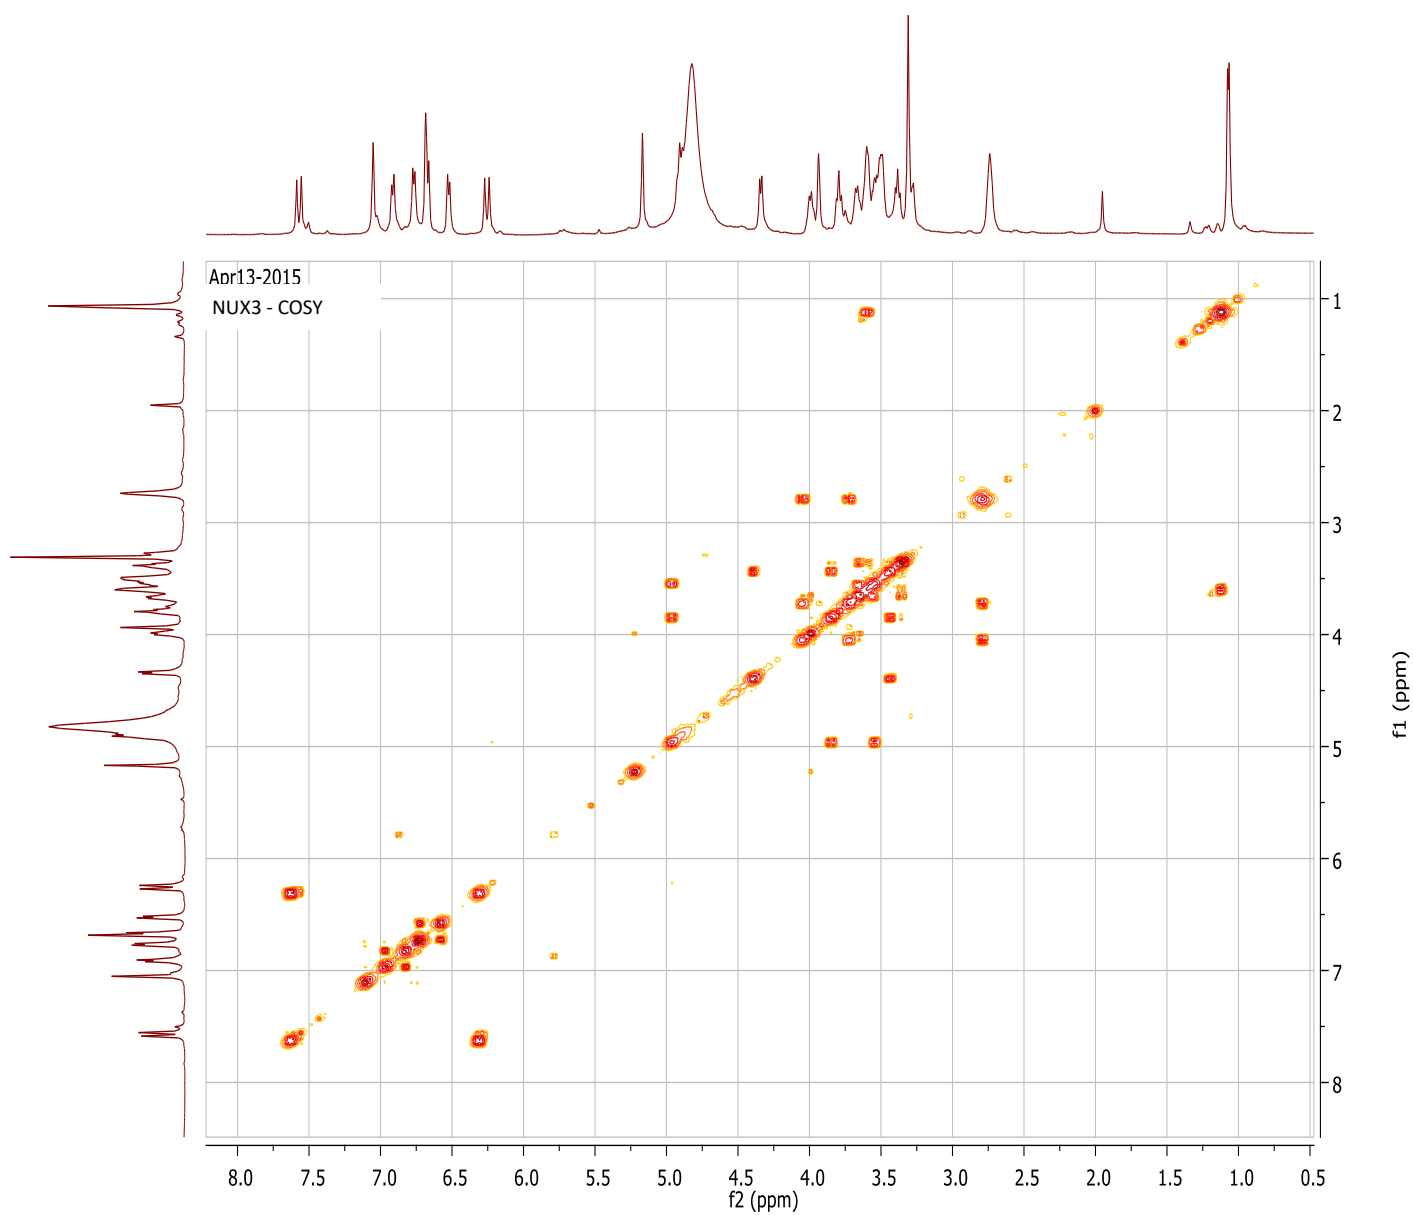

**Figure S14** COSY spectrum (500 MHz, CD<sub>3</sub>OD) spectrum of compound **3**

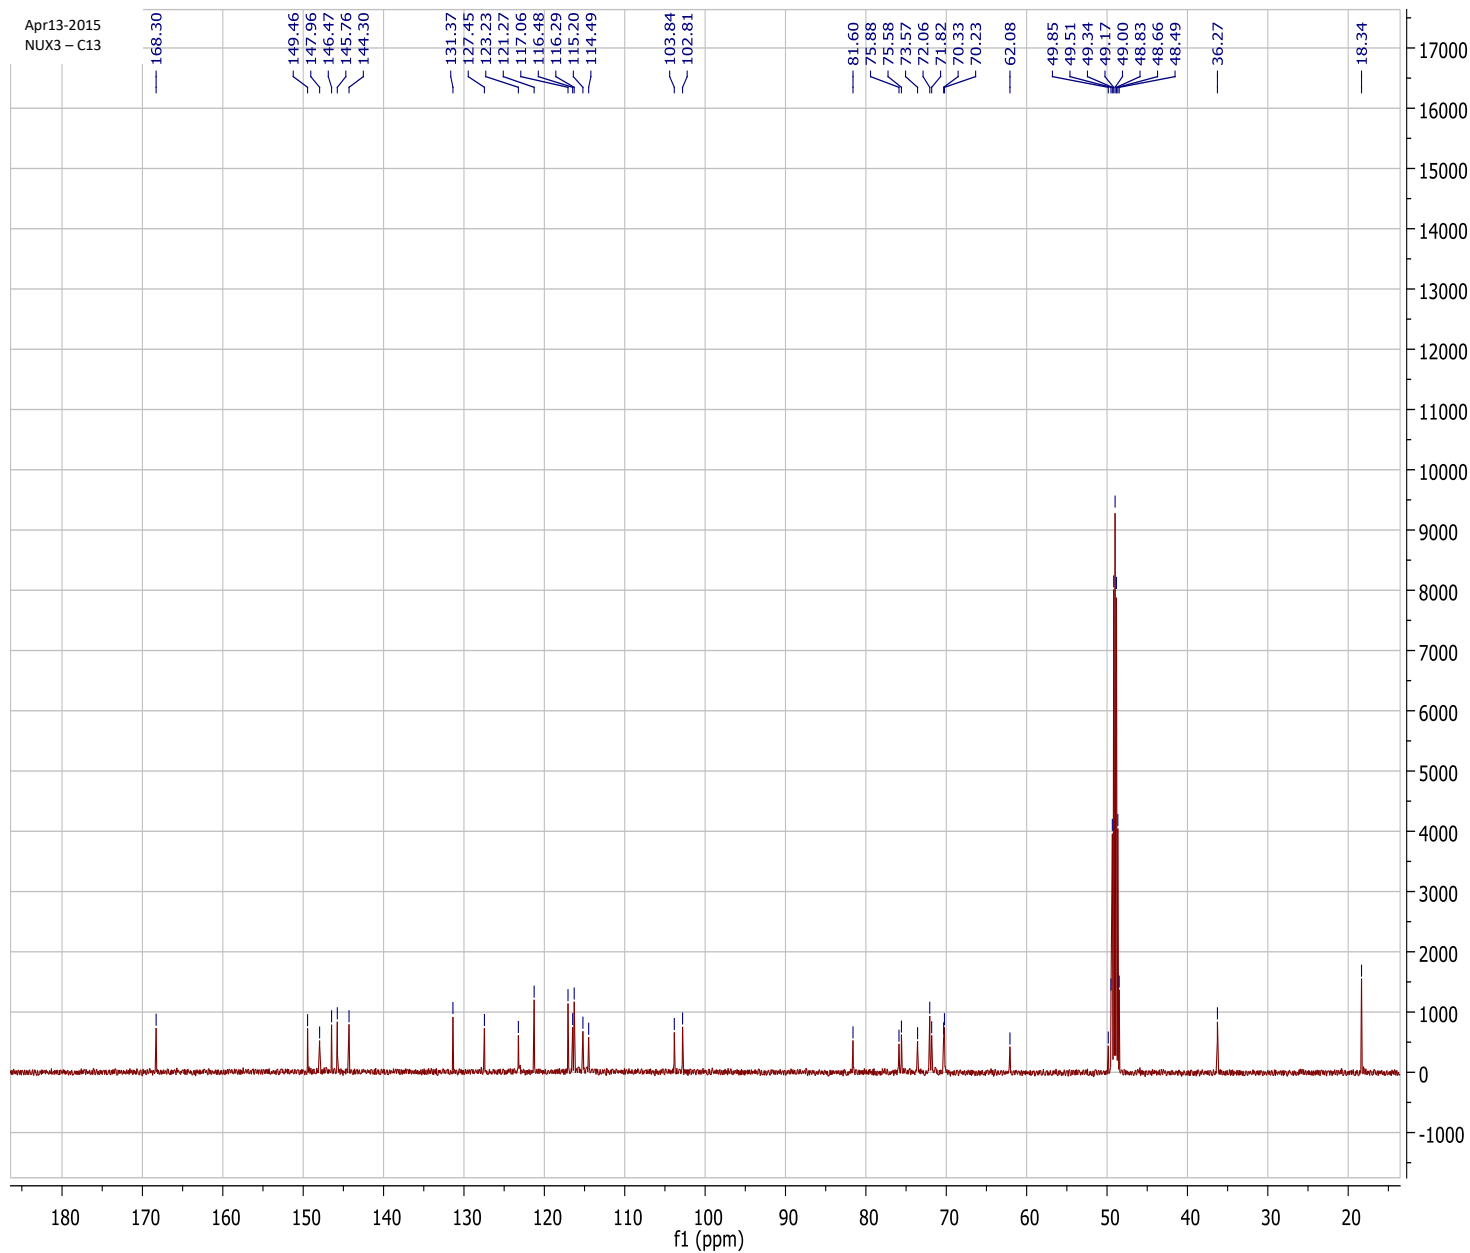

**Figure S15**  $^{13}\text{C}$ NMR (125MHz,  $\text{CD}_3\text{OD}$ ) spectrum of compound **3**

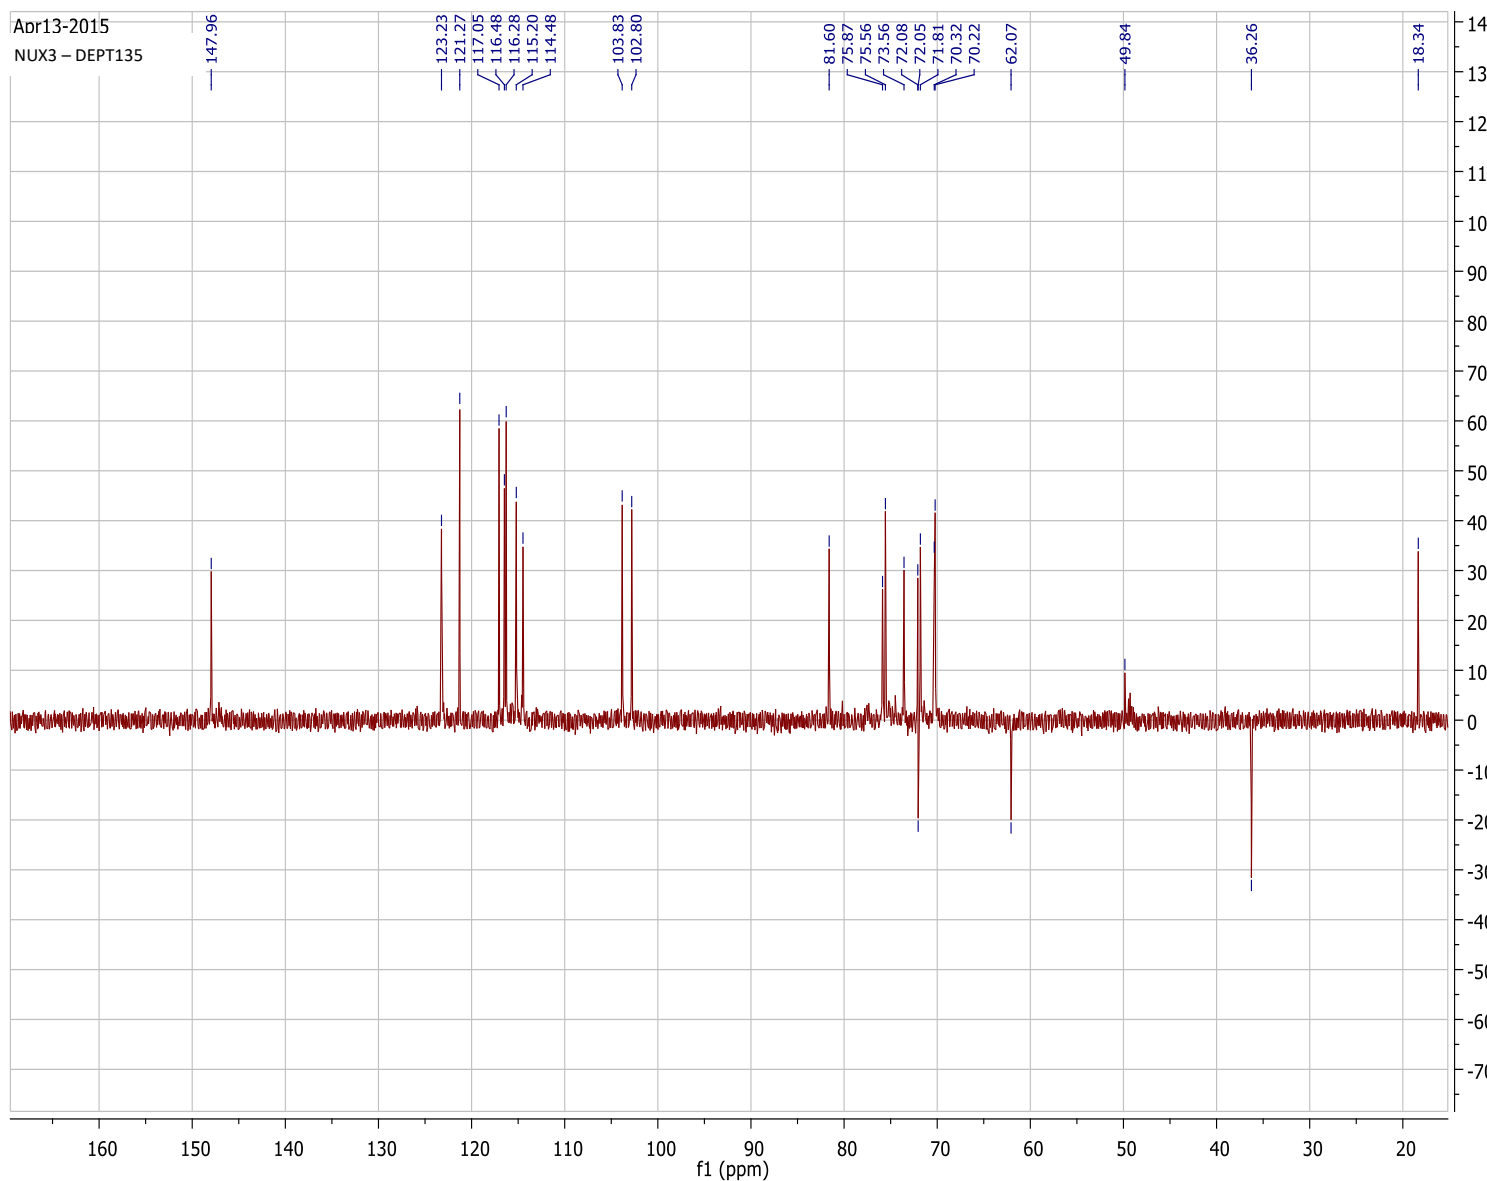

Figure S16 DEPT experiment (125MHz, CD<sub>3</sub>OD) spectrum of compound 3

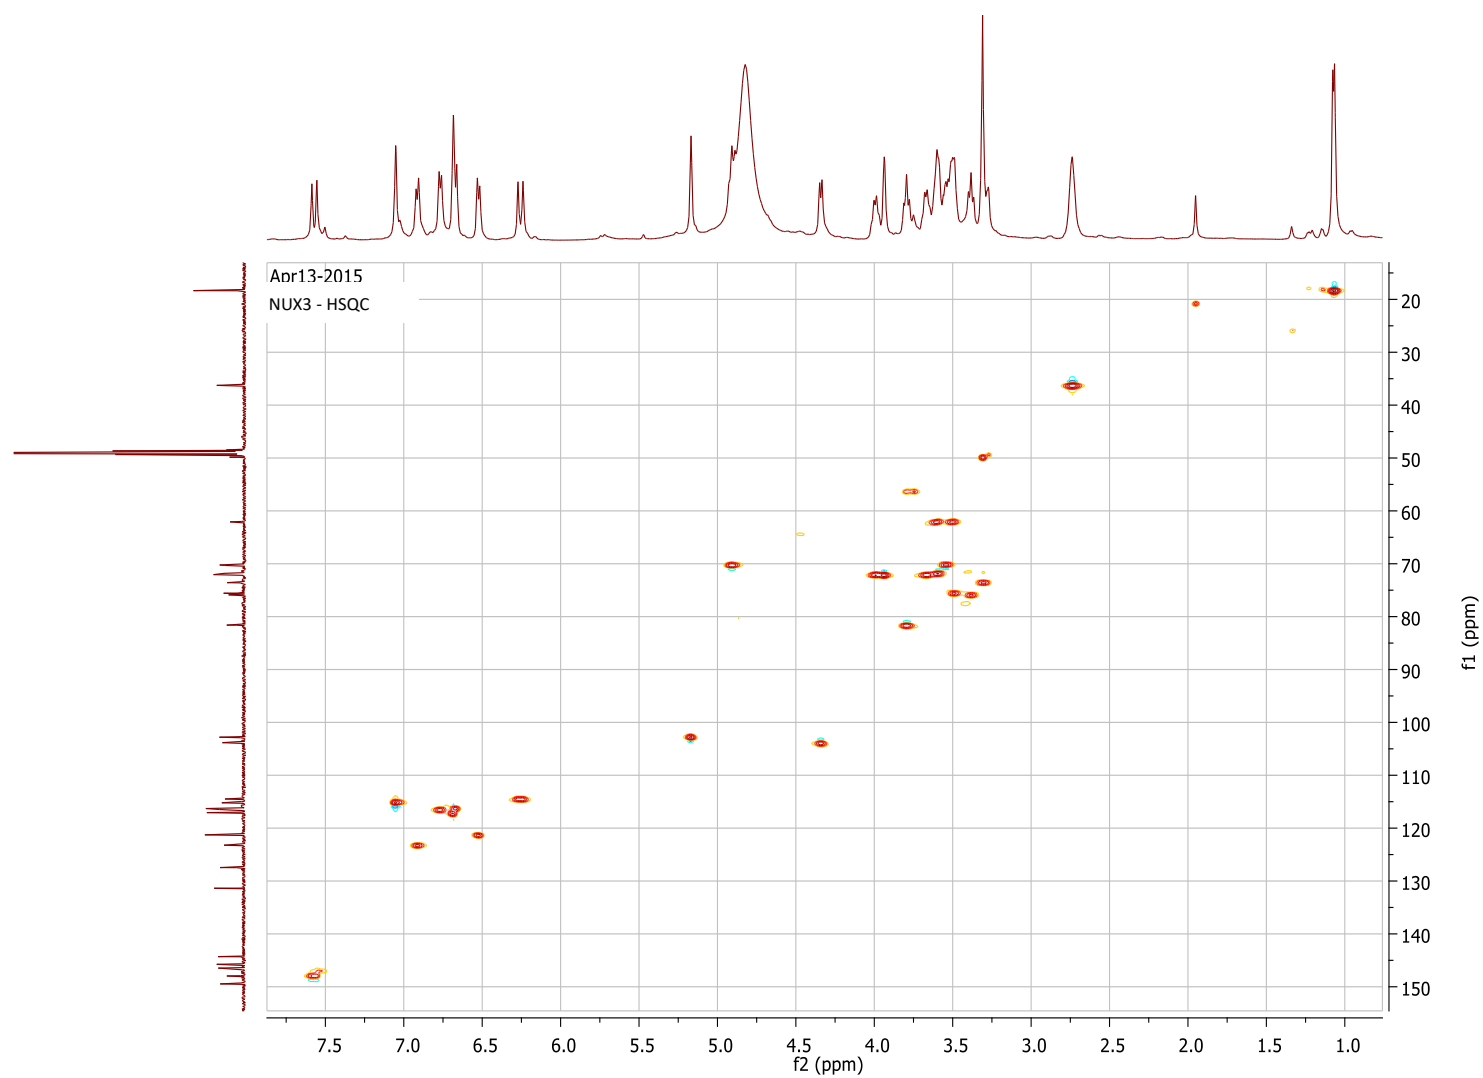

**Figure S17** HSQC (500 MHz, CD<sub>3</sub>OD) spectrum of compound **3**

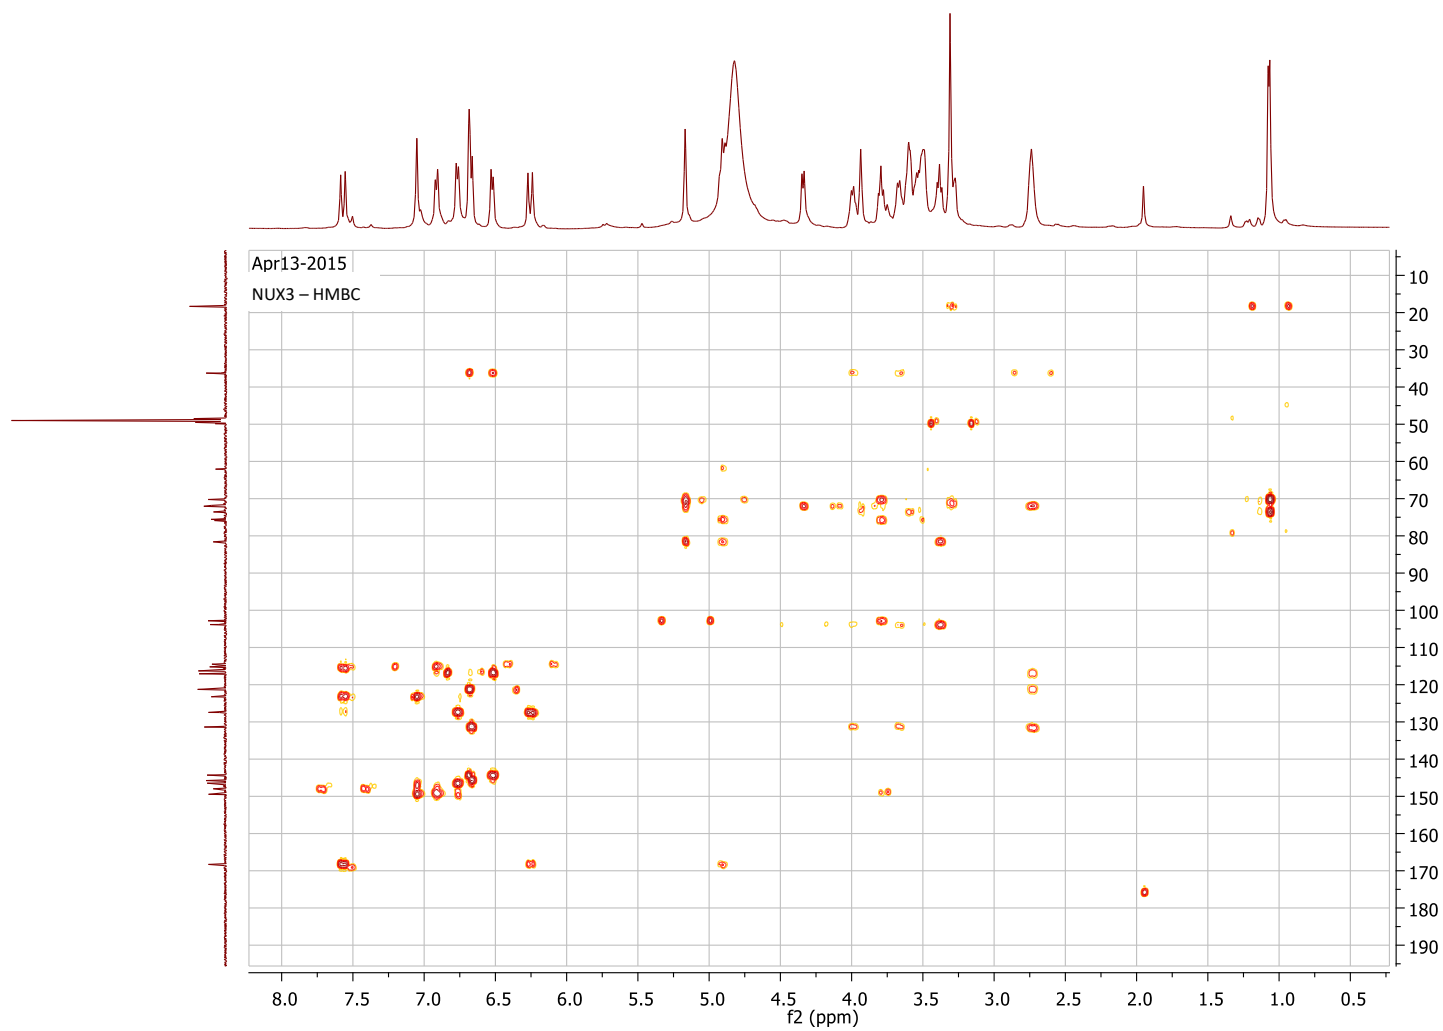

**Figure S18** HMBC (500 MHz, CD<sub>3</sub>OD) spectrum of compound **3**

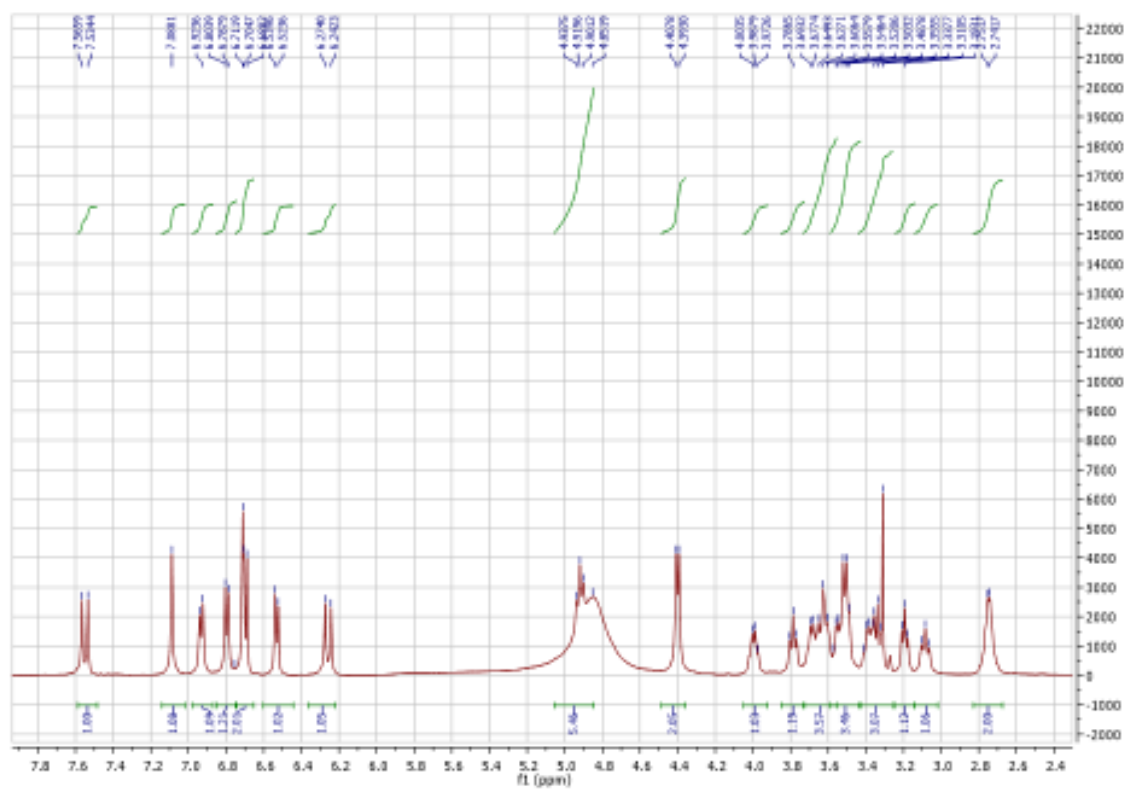

Figure S19  $^1\text{H}$ NMR (500MHz,  $\text{CD}_3\text{OD}$ ) spectrum of compound 5

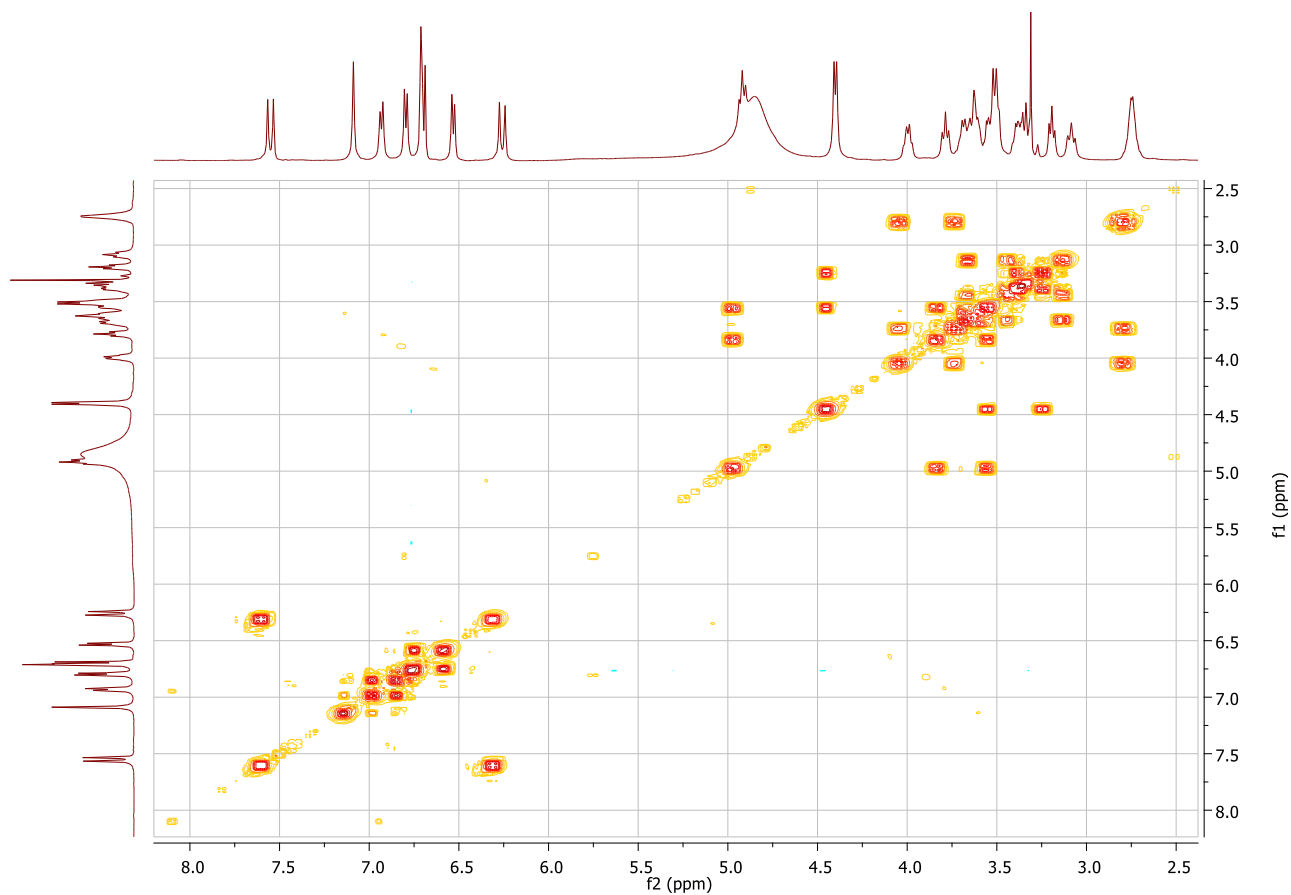

Figure S20 COSY (500 MHz,  $\text{CD}_3\text{OD}$ ) spectrum of compound 5

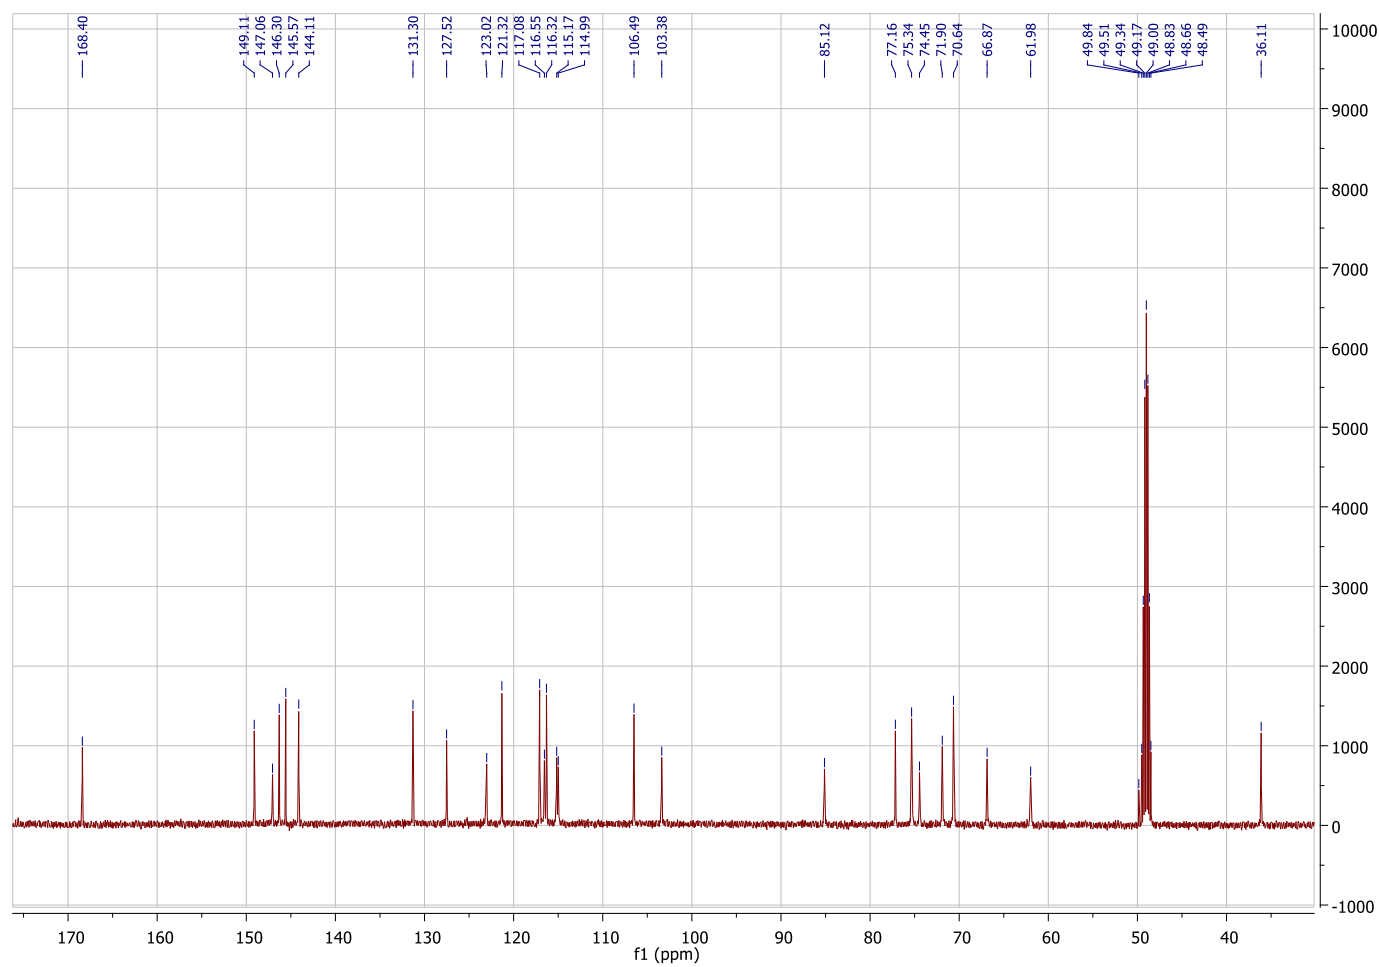

**Figure S21**  $^{13}\text{C}$ NMR (125MHz,  $\text{CD}_3\text{OD}$ ) spectrum of compound **5**



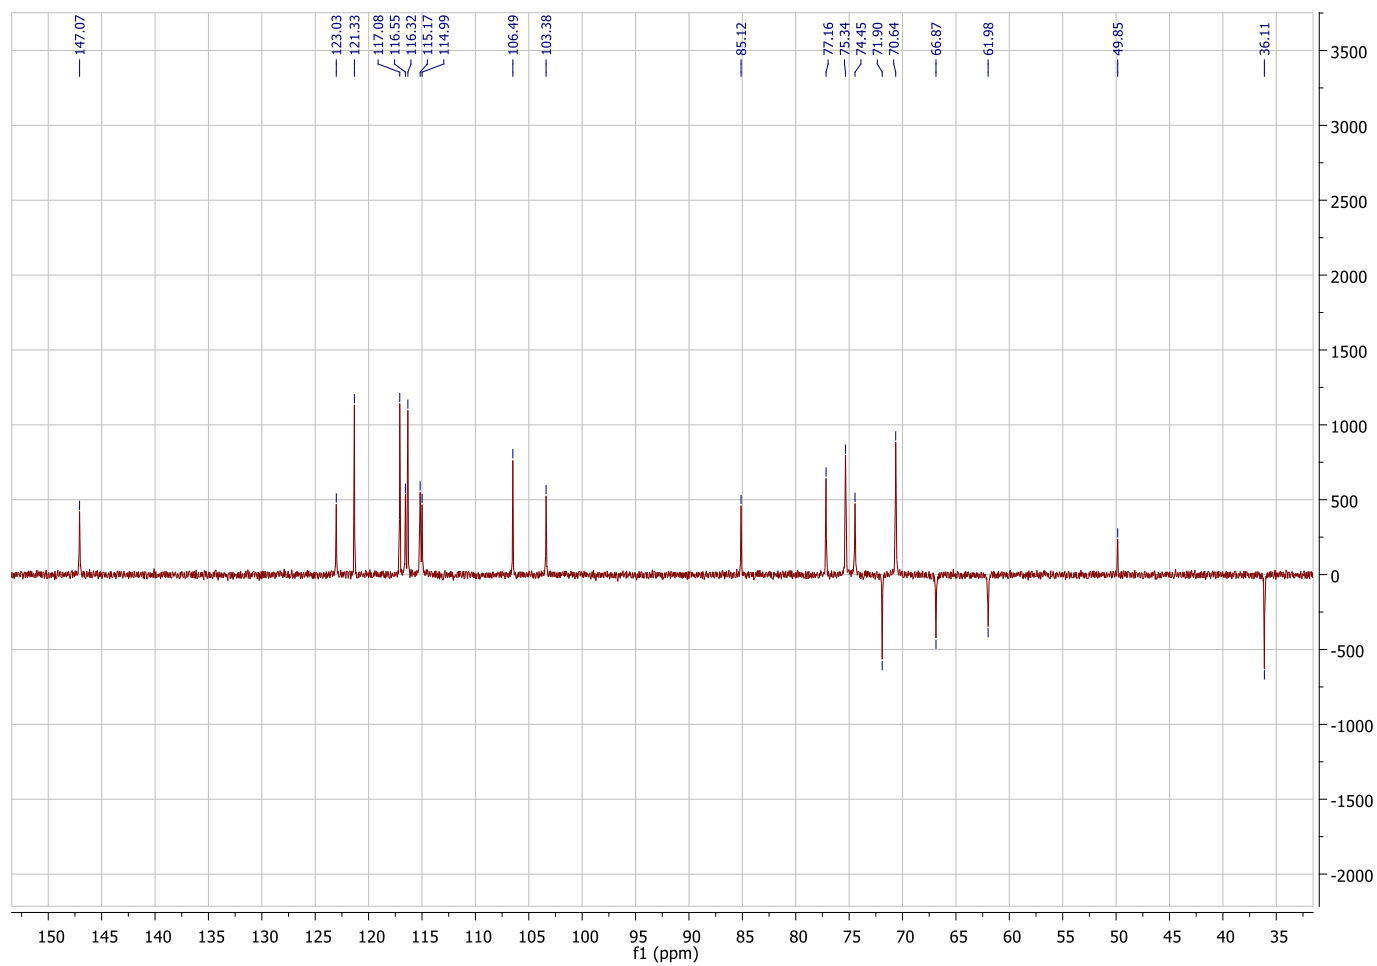

Figure S22 DEPT experiment (500 MHz, CD<sub>3</sub>OD) spectrum of compound 5

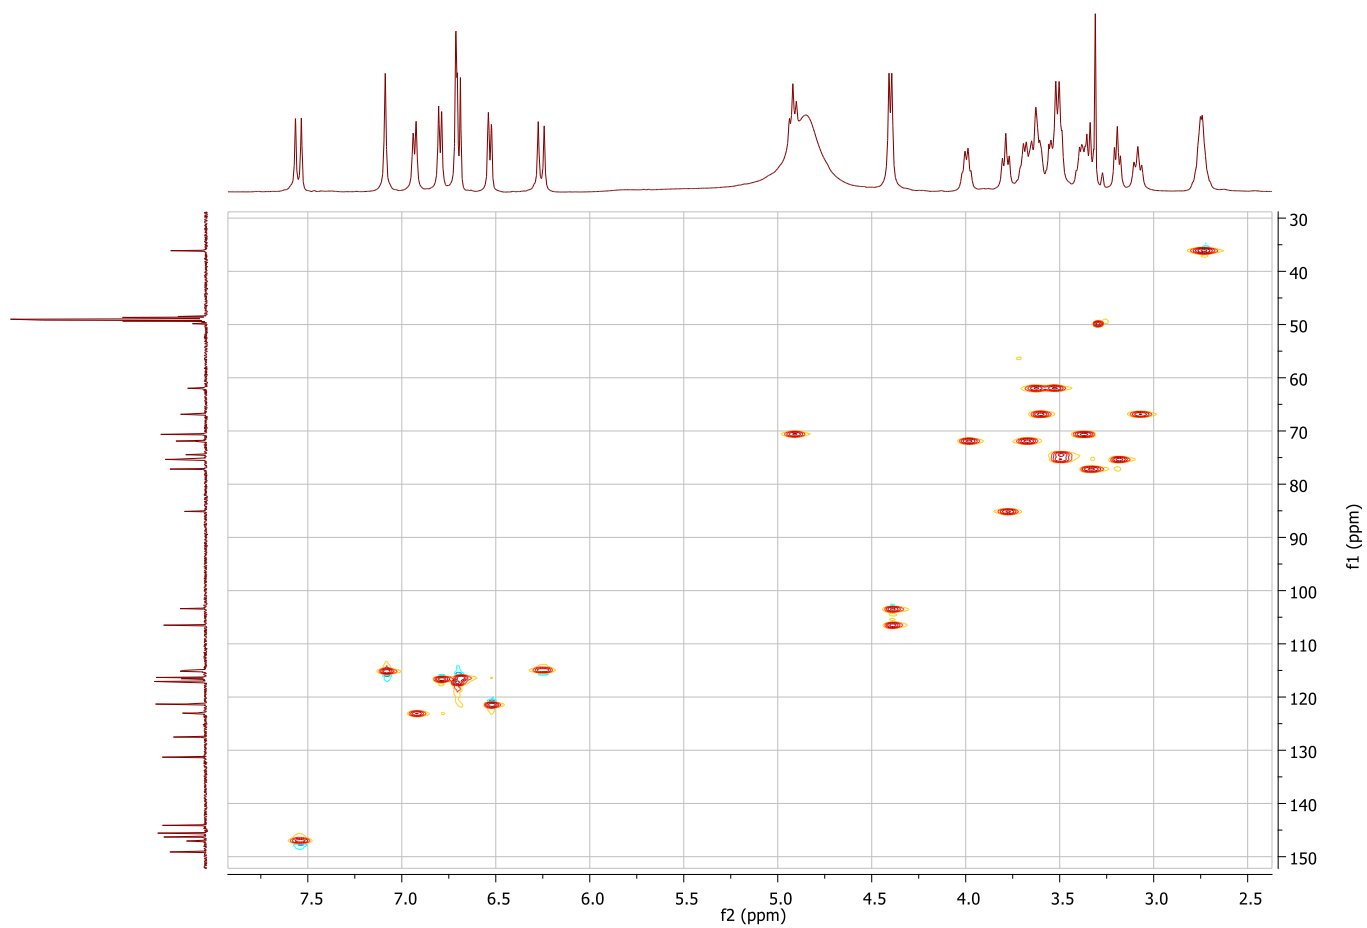

**Figure S23** HSQC (500 MHz, CD<sub>3</sub>OD) spectrum of compound **5**

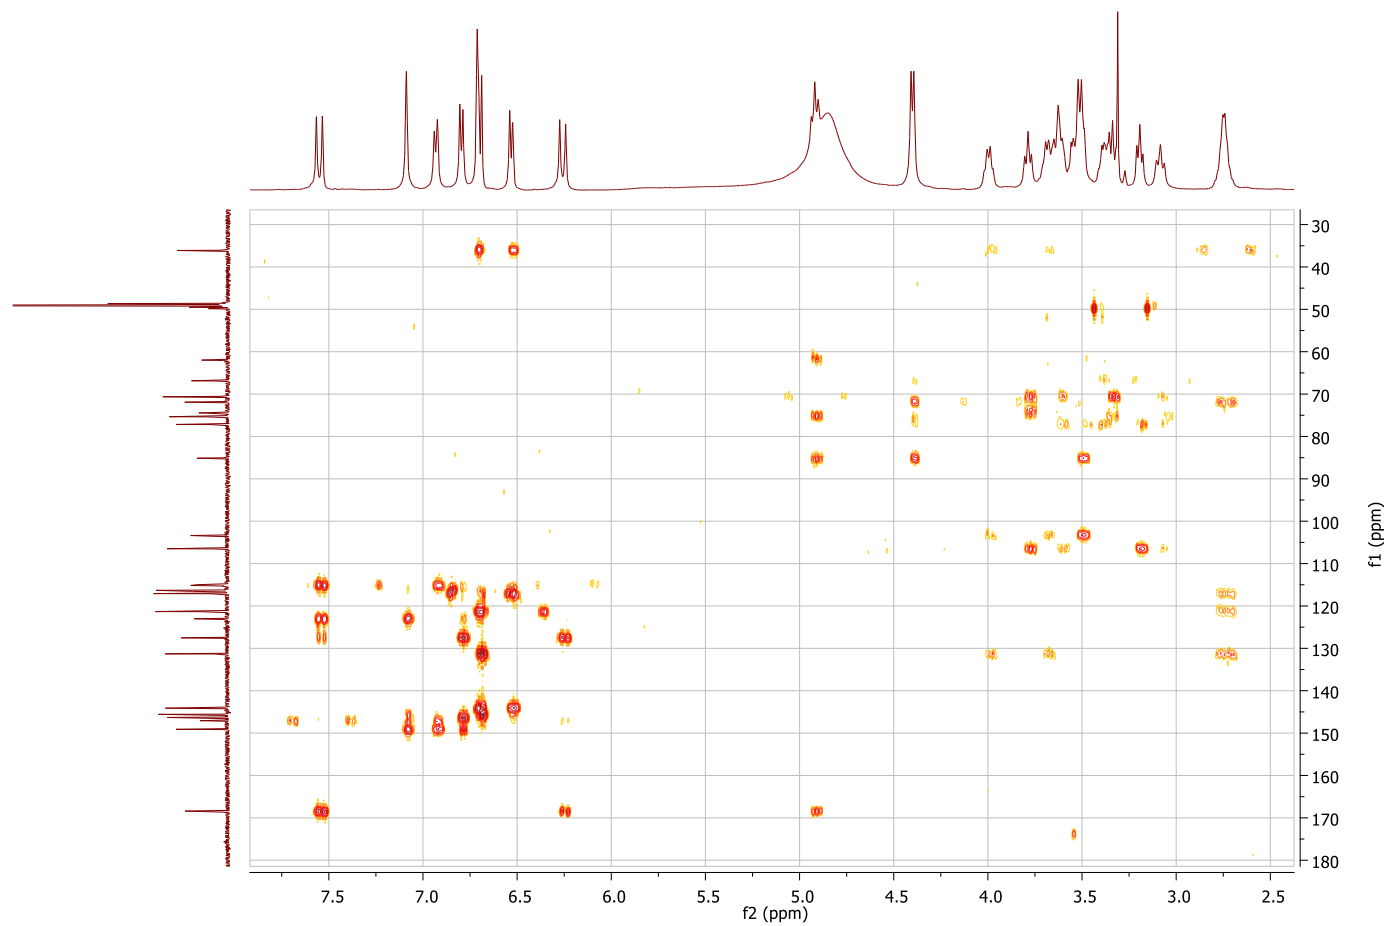

**Figure S24** HMBC (500 MHz, CD<sub>3</sub>OD) spectrum of compound **5**
