# Supplementary material for: Insecticidal Activity and Free Radical Scavenging Properties of Isolated Phytoconstituents from the Saudi Plant Nuxia oppositifolia (Hochst.)
Source: MDPI journal article supplement (doi:10.3390/molecules26040914), 2021-02-09
Supplement: s1 [file s1]

USDA ARS CMAVE  
 Mosquito & Fly Research Unit  
 Estep Laboratory  
 08NOV2020

Calculation verification of Nuxia LD50 data from 2016 testing

Data location: USDA ARS CMAVE Notebook: JL-8, pages 40-42

Percent Mortality Counts:

| log(ug/mosq) | Compound<br>7 | Compound<br>8 | Compound<br>9 | N15H-<br>12 | assay |
|--------------|---------------|---------------|---------------|-------------|-------|
| 0.69897      | 80            | 60            | 60            | 90          | 1     |
| -0.30103     | 0             | 0             | 0             | 0           | 1     |
| -1.30103     | 0             | 0             | 0             | 0           | 1     |
| -2.30103     | 0             | 0             | 0             | 0           | 1     |
| 0.69897      | 100           | 100           | 100           | 100         | 2     |
| 0.60206      | 90            | 90            | 90            | 100         | 2     |
| 0.477121     | 50            | 80            | 50            | 100         | 2     |
| 0.30103      | 50            | 20            | 20            | 40          | 2     |
| 0            | 0             | 0             | 0             | 0           | 2     |
| -0.30103     | 10            | 0             | 0             | 0           | 2     |
| 0.69897      |               |               | 100           |             | 3     |
| 0.60206      | 100           | 90            | 100           | 100         | 3     |
| 0.544068     | 100           |               |               |             | 3     |
| 0.477121     | 70            | 80            | 100           | 90          | 3     |
| 0.39794      |               | 100           |               | 100         | 3     |
| 0.30103      | 40            | 10            | 70            | 50          | 3     |
| 0.176091     |               |               |               | 20          | 3     |

|          |    |    |    |   |   |
|----------|----|----|----|---|---|
| 0        | 10 | 50 | 10 | 0 | 3 |
| -0.30103 | 0  | 10 | 0  |   | 3 |

Rerun analysis (on 08NOV2020) using data above in Prism v8.4.3 to check:

| Compounds         | LD50 (95% CI)    | R2     |
|-------------------|------------------|--------|
| Compound <b>6</b> | 2.10 (1.90-2.09) | 0.9820 |
| Compound <b>7</b> | 2.22 (1.89-2.53) | 0.9424 |
| Compound <b>8</b> | 2.08 (wide)      | 0.7976 |
| Compound <b>9</b> | 2.15 (1.64-2.67) | 0.8642 |

|                                                               | Compound <b>6</b> | Compound <b>7</b> | Compound <b>8</b><br>Ambiguous | Compound <b>9</b> |
|---------------------------------------------------------------|-------------------|-------------------|--------------------------------|-------------------|
| log(agonist) vs. response -- Variable slope (four parameters) |                   |                   |                                |                   |
| Best-fit values                                               |                   |                   |                                |                   |
| Bottom                                                        | = 0.000           | = 0.000           | = 0.000                        | = 0.000           |
| Top                                                           | = 100.0           | = 100.0           | = 100.0                        | = 100.0           |
| LogEC50                                                       | 0.3029            | 0.3457            | ~ 0.3175                       | 0.3314            |
| HillSlope                                                     | 9.048             | 3.361             | ~ 45.83                        | 3.297             |
| EC50                                                          | 2.009             | 2.217             | ~ 2.077                        | 2.145             |
| Span                                                          | = 100.0           | = 100.0           | = 100.0                        | = 100.0           |
| Std. Error                                                    |                   |                   |                                |                   |
| LogEC50                                                       | 0.008185          | 0.02863           | ~ 1.520                        | 0.04887           |
| HillSlope                                                     | 1.946             | 0.6445            | ~ 4239                         | 1.052             |
| 95% CI (profile likelihood)                                   |                   |                   |                                |                   |
| LogEC50                                                       | 0.2793 to 0.3203  | 0.2772 to 0.4035  | (Very wide)                    | 0.2159 to 0.4257  |
| HillSlope                                                     | 5.682 to ???      | 2.290 to 5.071    | (Very wide)                    | 1.800 to 8.937    |
| EC50                                                          | 1.902 to 2.091    | 1.893 to 2.532    | (Very wide)                    | 1.644 to 2.665    |
| Goodness of Fit                                               |                   |                   |                                |                   |
| Degrees of Freedom                                            | 14                | 14                | 14                             | 14                |
| R squared                                                     | 0.9820            | 0.9424            | 0.7976                         | 0.8642            |
| Sum of Squares                                                | 569.1             | 1474              | 5250                           | 3934              |
| Sy.x                                                          | 6.376             | 10.26             | 19.36                          | 16.76             |
| Constraints                                                   |                   |                   |                                |                   |
| Bottom                                                        | Bottom = 0        | Bottom = 0        | Bottom = 0                     | Bottom = 0        |
| Top                                                           | Top = 100         | Top = 100         | Top = 100                      | Top = 100         |

Number of points

|                     |    |    |    |    |
|---------------------|----|----|----|----|
| # of X values       | 18 | 19 | 19 | 19 |
| # Y values analyzed | 16 | 16 | 16 | 16 |
